# Supplementary material for: CancerVar: An artificial intelligence–empowered platform for clinical interpretation of somatic mutations in cancer
Source: PubMed Central journal article supplement — Sci Adv. 2022 May 6;8(18):eabj1624. doi: 10.1126/sciadv.abj1624 (PMC9075800; doi:10.1126/sciadv.abj1624), 2022-05-06
Supplement: sciadv.abj1624_sm.pdf [file sciadv.abj1624_sm.pdf]

Supplementary Materials for  
**CancerVar: An artificial intelligence–empowered platform for clinical interpretation of somatic mutations in cancer**

Quan Li, Zilin Ren, Kajia Cao, Marilyn M. Li, Kai Wang\*, Yunyun Zhou\*

\*Corresponding author. Email: wangk@chop.edu (K.W.); zhoy6@chop.edu (Y.Z.)

Published 6 May 2022, *Sci. Adv.* **8**, eabj1624 (2022)  
DOI: 10.1126/sciadv.abj1624

**The PDF file includes:**

Figs. S1 to S4  
Tables S1 and S2, S4 to S6  
Legend for table S3

**Other Supplementary Materials for this manuscript include the following:**

Table S3

# Supplementary figures

## Figure-S1 Pie chart of the comparison between CancerVar with database of OncoKB

### OncoKB & Model-based CancerVar

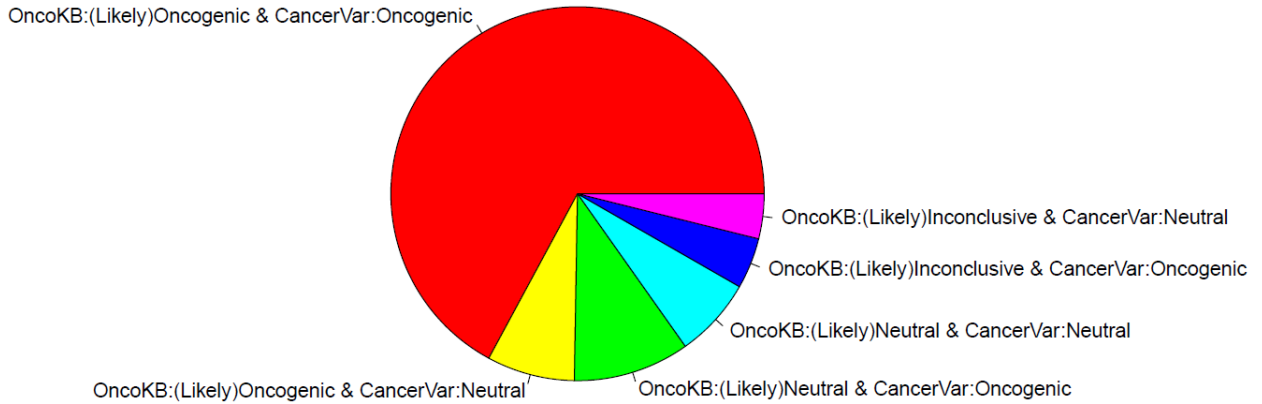

(a)

### OncoKB & Rule-based CancerVar

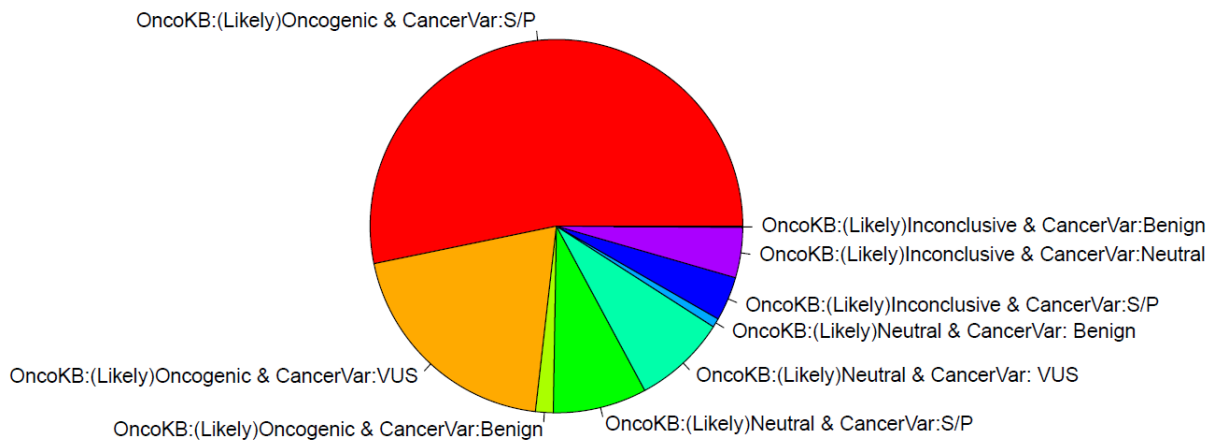

(b)

**Figure-S2 Pie chart of the comparison between CancerVar, OncoKB with database of IARC TP53**

**IARC TP53 & Model-based CancerVar**

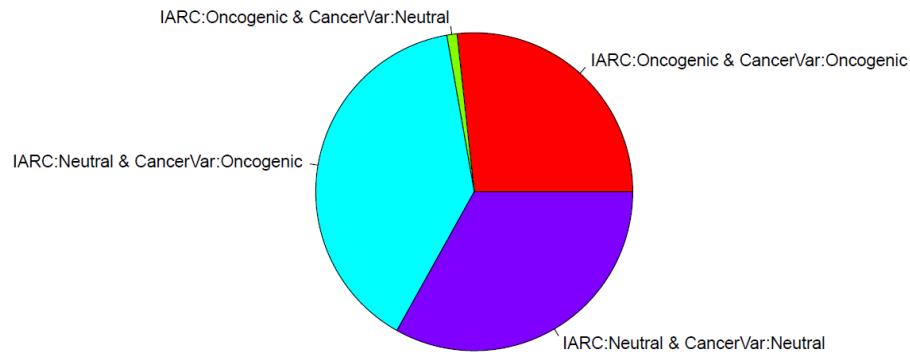

(a)

**IARC TP53 & Rule-based CancerVar**

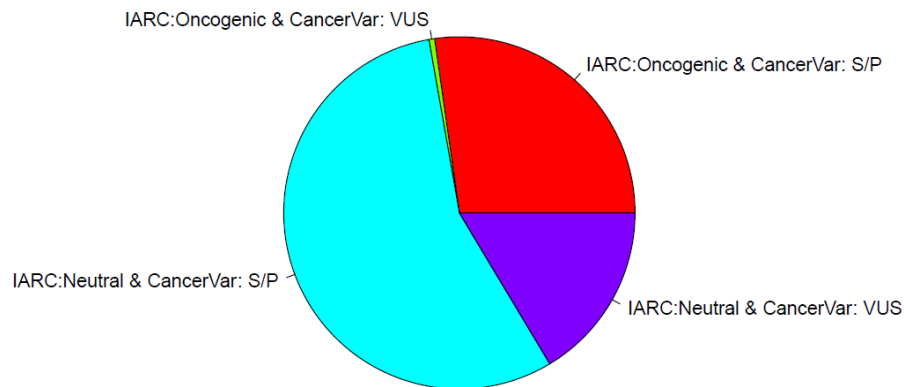

(b)

**IARC TP53 & OncoKB**

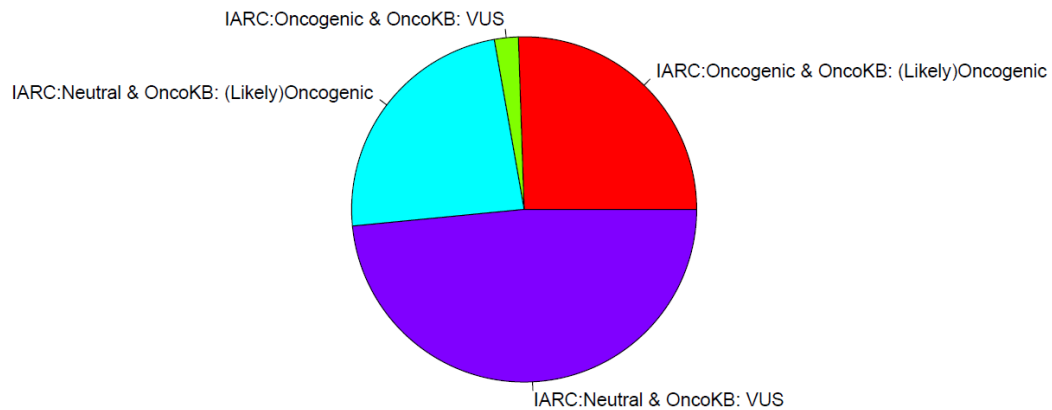

(c)

**Figure-S3 Pie chart of the comparison between CancerVar, OncoKB with database of *in vitro* cell viability**

**Cell Viability & Model-based CancerVar**

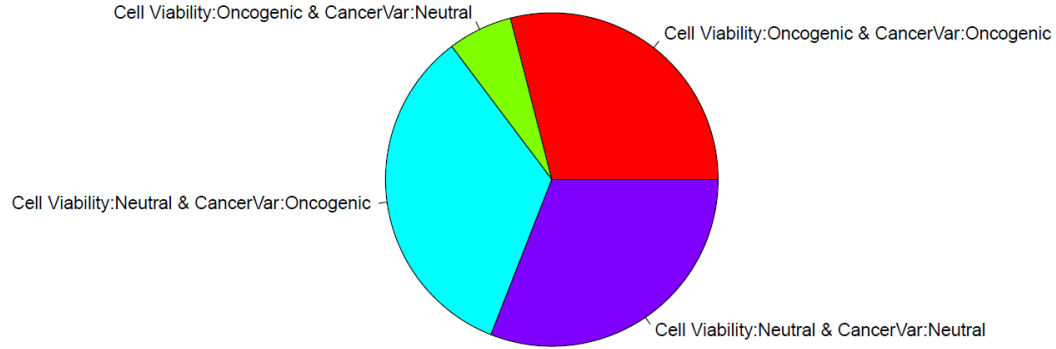

(a)

**Cell Viability & Rule-based CancerVar**

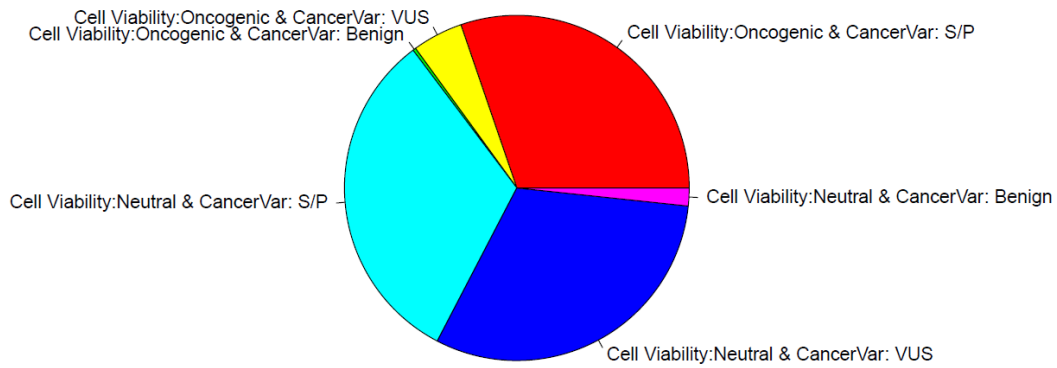

(b)

**Cell Viability & OncoKB**

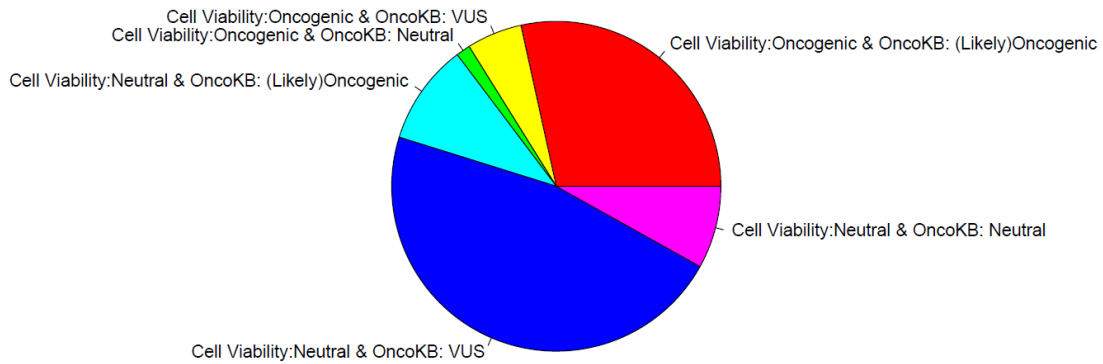

(c)

**Figure-S4 Bar plot of Feature importance from Random Forest**

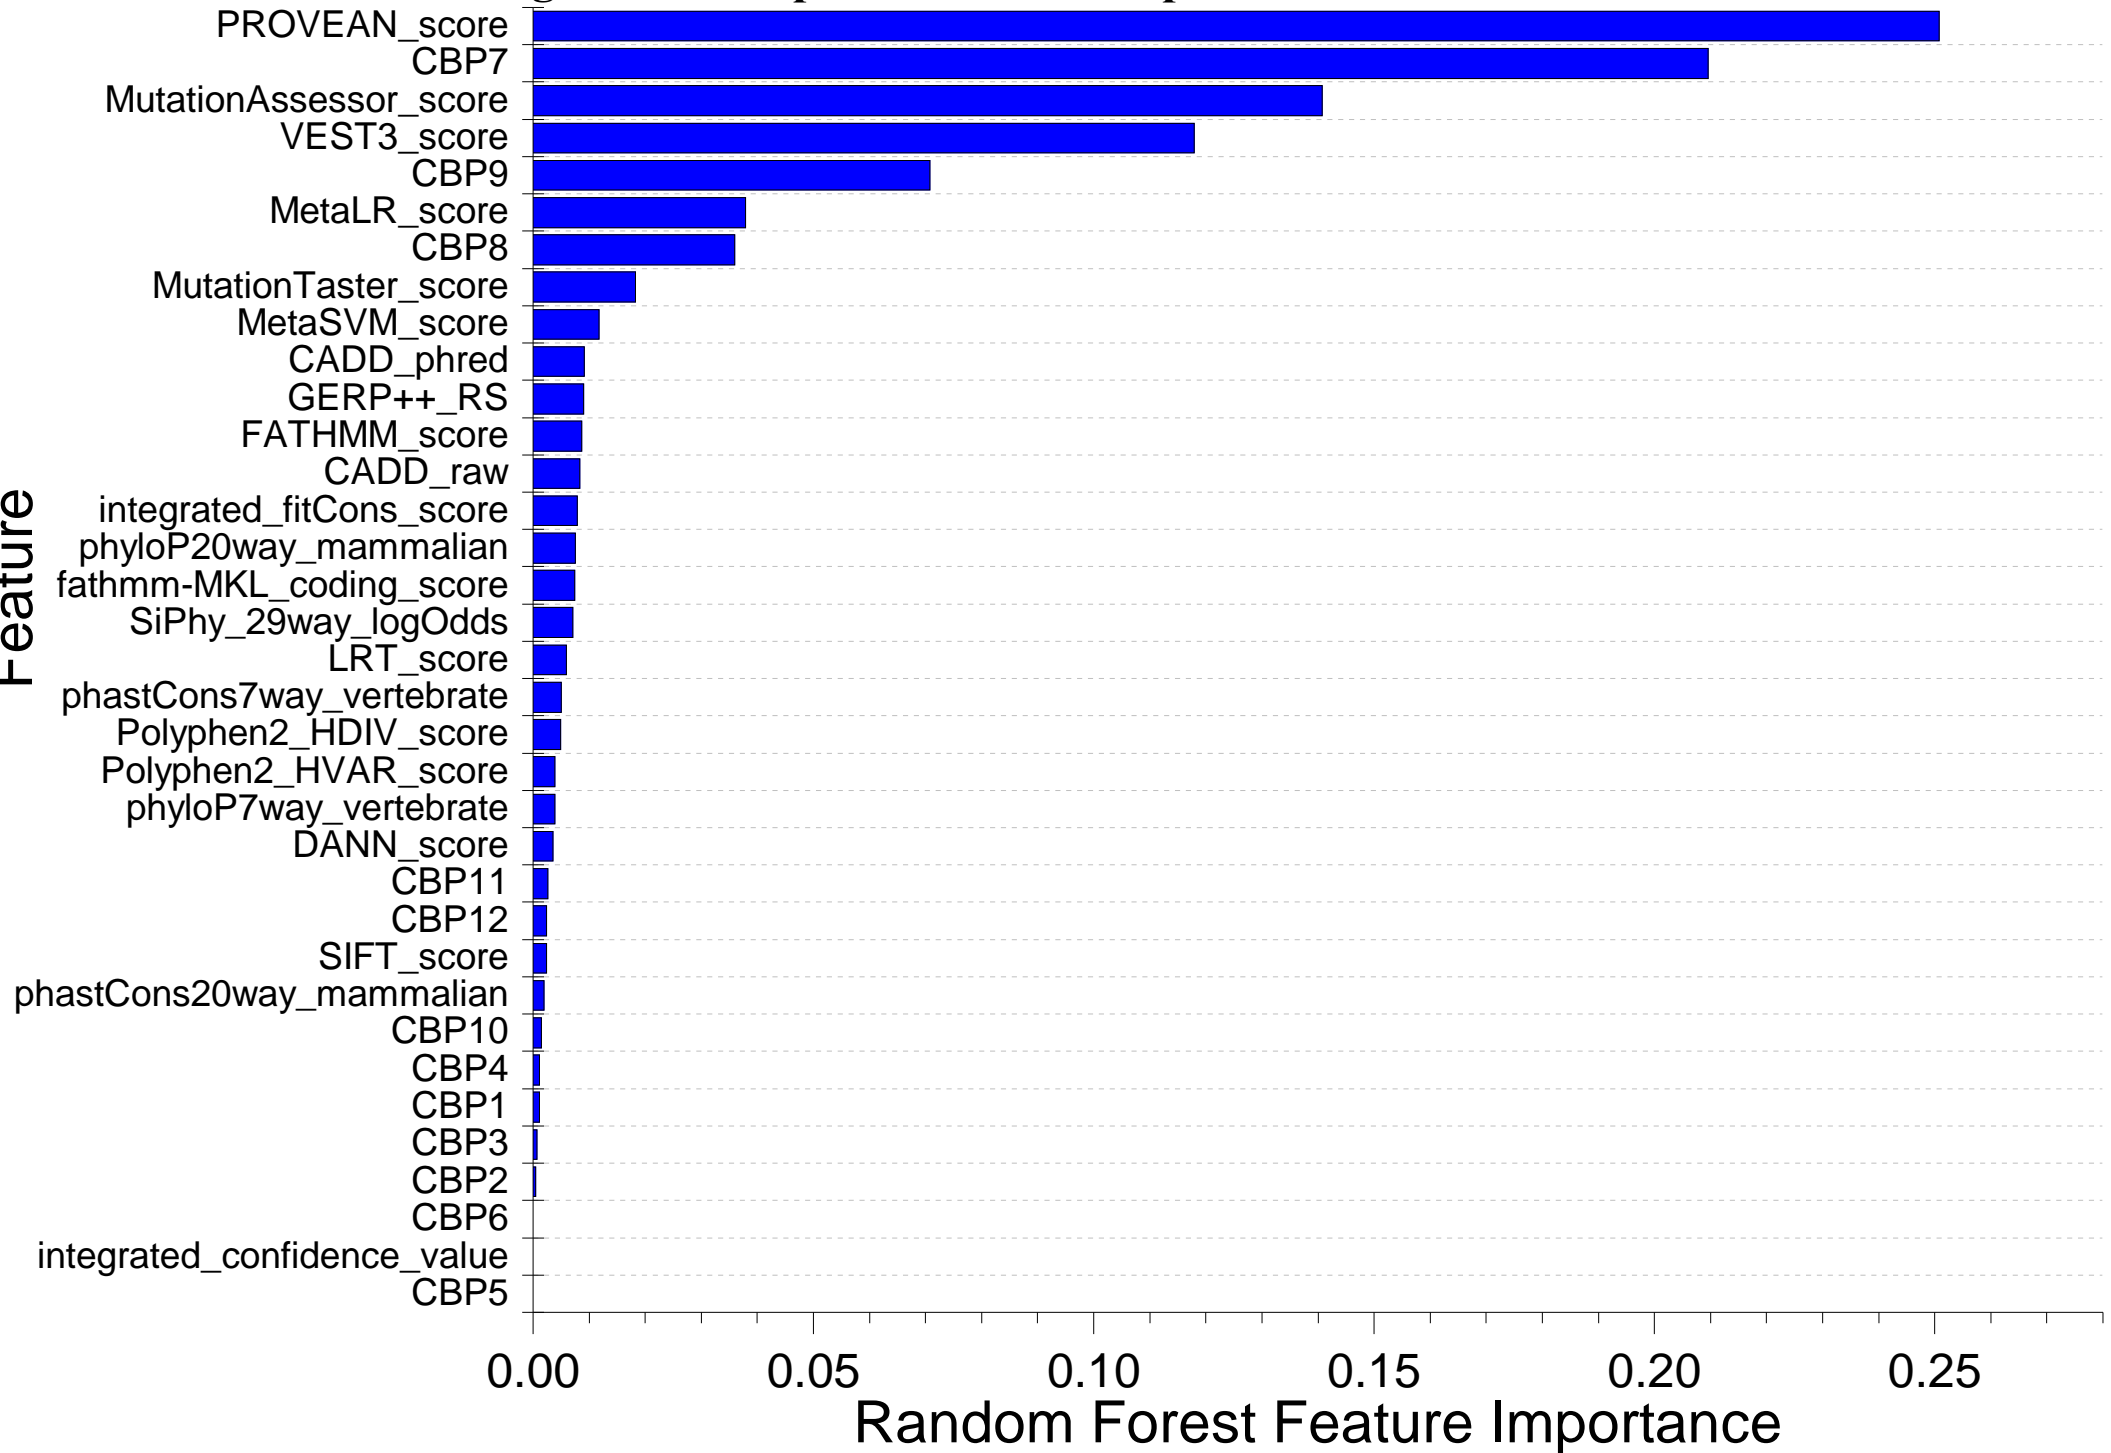

## Supplementary tables

**Table-S1 Genes compiled in CancerVar from 7 databases and 2 driver gene predictions**

| Source                         | Version/Date | Sum of unique genes | Notes                                                                                                                               |
|--------------------------------|--------------|---------------------|-------------------------------------------------------------------------------------------------------------------------------------|
| OncoKB                         | 2020/05/11   | 1059                | <a href="https://www.oncokb.org/cancerGenes">https://www.oncokb.org/cancerGenes</a>                                                 |
| Cosmic                         | V91          | 723                 | <a href="https://cancer.sanger.ac.uk/cosmic/census">https://cancer.sanger.ac.uk/cosmic/census</a> ,                                 |
| CGI/ Cancer Genome Interpreter | 2017/05/01   | 765                 | <a href="https://www.cancergenomeinterpreter.org/genes">https://www.cancergenomeinterpreter.org/genes</a>                           |
| IntoGen                        | 2020/02/01   | 568                 | <a href="https://www.intogen.org/download">https://www.intogen.org/download</a>                                                     |
| CIViC                          | 2020/05/01   | 428                 | <a href="https://civicdb.org/releases">https://civicdb.org/releases</a>                                                             |
| JAX CKB                        | CKB core     | 85                  | <a href="https://ckb.jax.org/gene/grid">https://ckb.jax.org/gene/grid</a>                                                           |
| PMKB                           | V1.4.6       | 610                 | <a href="https://pmkb.weill.cornell.edu/genes">https://pmkb.weill.cornell.edu/genes</a>                                             |
| Bailey et al. (2)              | 2018         | 299                 | <a href="https://www.cell.com/cell/references/S0092-8674(18)30237-X">https://www.cell.com/cell/references/S0092-8674(18)30237-X</a> |
| MutPanning                     | 2020         | 460                 | <a href="http://www.cancer-genes.org">http://www.cancer-genes.org</a>                                                               |
| ALL(CancerVar)                 | -            | 1911                | <a href="http://cancervar.wglab.org/">http://cancervar.wglab.org/</a>                                                               |

**Table-S2 CancerVar clinical evidence features and score system**

| Evidence type       | Evidence code | Scores                                               |                                                                               |                                                                                    |                                       |
|---------------------|---------------|------------------------------------------------------|-------------------------------------------------------------------------------|------------------------------------------------------------------------------------|---------------------------------------|
|                     |               | 2                                                    | 1                                                                             | 0                                                                                  | -1                                    |
| Therapeutic         | CBP1          | FDA approved or investigational with strong evidence | FDA approved or investigational with strong evidence in different tumour type | None                                                                               | NA                                    |
| Diagnostic          | CBP2          | In PG or reported evidence with consensus            | not in PG but with convincing published data                                  | None                                                                               | NA                                    |
| Prognostic          | CBP3          | In PG or reported evidence with consensus            | not in PG but with convincing published data                                  | None                                                                               | NA                                    |
| Mutation type       | CBP4          | NA                                                   | Activating, LOF (missense, nonsense, indel, splicing), CNAs, fusions          | Functionally unknown; mostly missense, in-frame indels; less commonly, other types | NA                                    |
| Variant frequencies | CBP5          | NA                                                   | NA                                                                            | NA                                                                                 | NA                                    |
| Potential germline  | CBP6          | NA                                                   | NA                                                                            | NA                                                                                 | NA                                    |
| Population data     | CBP7          | NA                                                   | Absent or extremely low MAF in ESP, dbSNP, 1000Genome, ExAC, gnomAD           | MAF>0.01% in the general population; or high MAF(>5%) in some ethnic populations   | NA                                    |
| Germline data       | CBP8          | NA                                                   | Clinvar/HGMD showed as (likely)Pathogenic                                     |                                                                                    | Clinvar/HGMD showed as (likely)benign |

|                     |       |                                                                                                                                               |                                                                                                                                               |                                                                               |                                                                         |
|---------------------|-------|-----------------------------------------------------------------------------------------------------------------------------------------------|-----------------------------------------------------------------------------------------------------------------------------------------------|-------------------------------------------------------------------------------|-------------------------------------------------------------------------|
| Somatic data        | CBP9  | Showed in $\geq 2$ Somatic database: : COSMIC, ICGC,TCGA and My Caner Genome                                                                  | Showed in one of Somatic database: COSMIC, ICGC,TCGA and My Caner Genome                                                                      | Do not show in any of Somatic database: COSMIC, ICGC,TCGA and My Caner Genome | NA                                                                      |
| Predictive software | CBP10 | $\geq 6$ predictions showed as pathogenic in total 7 Predictive softwares: SIFT, PolyPhen2, MutationAssessor, MetaLR, GERP++, MetaSVM, FATHMM | $\geq 4$ predictions showed as pathogenic in total 7 Predictive softwares: SIFT, PolyPhen2, MutationAssessor, MetaLR, GERP++, MetaSVM, FATHMM | The prediction is Variable or conflict                                        | $\geq 4$ predictions showed as (likely)benign in 7 Predictive softwares |
| Pathway             | CBP11 | NA                                                                                                                                            | Involve disease-associated pathways or pathogenic pathways                                                                                    | Do not Involve any disease-associated pathways nor pathogenic pathways        | NA                                                                      |
| Publication         | CBP12 | Publication reported pathogenic evidence with consensus                                                                                       | Publication reported pathogenic evidence for different tumour types or without consensus                                                      | None publication or no convincing evidence for pathogenic                     | Publications Reported evidence supportive of benign/likely benign       |

\*PG: professional guidelines

**Table-S3 48 variants classification comparisons between 20 reporters and CancerVar** (showed as excel table)



**Table-S4. CancerVar and OncoKB predictions on mutations from the IARC TP53 transactivation dataset.**

| <b>IARC TP53<br/>Transactivation</b> | <b>Model-based<br/>CancerVar</b> |         | <b>Rule-based CancerVar</b> |     |        | <b>OncoKB</b> |     |         |
|--------------------------------------|----------------------------------|---------|-----------------------------|-----|--------|---------------|-----|---------|
|                                      | Oncogenic                        | Neutral | S/P                         | VUS | benign | O/LO          | VUS | Neutral |
| Oncogenic                            | 512                              | 20      | 522                         | 10  | 0      | 489           | 43  | 0       |
| Neutral                              | 749                              | 634     | 1069                        | 314 | 0      | 455           | 928 | 0       |
| Total                                | 1261                             | 654     | 1591                        | 324 | 0      | 944           | 971 | 0       |

**Table-S5. CancerVar and OncoKB predictions on mutations from the *in vitro* Cell Viability dataset by Ng. et al. (44)**

| <b>Cell Viability<br/>(<i>in vitro</i>)</b> | <b>Model-based<br/>CancerVar</b> |         | <b>Rule-based CancerVar</b> |     |        | <b>OncoKB</b> |     |         |
|---------------------------------------------|----------------------------------|---------|-----------------------------|-----|--------|---------------|-----|---------|
|                                             | Oncogenic                        | Neutral | S/P                         | VUS | benign | O/LO          | VUS | Neutral |
| Oncogenic                                   | 208                              | 45      | 217                         | 34  | 2      | 204           | 39  | 10      |
| Neutral                                     | 242                              | 222     | 230                         | 222 | 12     | 71            | 335 | 58      |
| Total                                       | 450                              | 267     | 447                         | 256 | 14     | 275           | 374 | 68      |

**Table-S6 CancerVar's predictions of whole exome mutations in 10 Oncogenes (ONC) and 10 Tumor suppressor genes (TSG).**

| Gene   | TSG/ ONC | Total exome mutations | Oncogenic variants predicted by CancerVar |           |
|--------|----------|-----------------------|-------------------------------------------|-----------|
|        |          |                       | Number                                    | Frequency |
| CDKN1A | TSG      | 1785                  | 22                                        | 0.012     |
| EP300  | TSG      | 21735                 | 226                                       | 0.010     |
| CREBBP | TSG      | 21987                 | 322                                       | 0.015     |
| ARID1A | TSG      | 20568                 | 97                                        | 0.0047    |
| KDM6A  | TSG      | 13086                 | 55                                        | 0.0042    |
| TP53   | TSG      | 3789                  | 467                                       | 0.12      |
| NF1    | TSG      | 25737                 | 226                                       | 0.0088    |
| NF2    | TSG      | 5472                  | 47                                        | 0.0086    |
| APC    | TSG      | 26091                 | 109                                       | 0.0042    |
| PIK3R1 | TSG      | 6891                  | 70                                        | 0.010     |
| GNA11  | ONC      | 3240                  | 60                                        | 0.018     |
| GNAQ   | ONC      | 3240                  | 46                                        | 0.014     |
| GNAS   | ONC      | 11997                 | 132                                       | 0.011     |
| EGFR   | ONC      | 11661                 | 153                                       | 0.013     |
| ERBB2  | ONC      | 11394                 | 88                                        | 0.0077    |
| ERBB4  | ONC      | 11781                 | 192                                       | 0.016     |
| KRAS   | ONC      | 2061                  | 58                                        | 0.028     |
| PIK3CA | ONC      | 9621                  | 65                                        | 0.0067    |
| AKT1   | ONC      | 4329                  | 32                                        | 0.0074    |
| CTNNB1 | ONC      | 7038                  | 49                                        | 0.007     |
